# Supplementary material for: PEGylated rhenium nanoclusters: a degradable metal photothermal nanoagent for cancer therapy
Source: PubMed Central journal article supplement — Chem Sci. 2019 Apr 23;10(21):5435–43. doi: 10.1039/c9sc00729f (PMC6544121; doi:10.1039/c9sc00729f), 2019-04-23
Supplement: SC-010-C9SC00729F-s001.pdf [file SC-010-C9SC00729F-s001.pdf]

*Electronic Supplementary Information for*

**PEGylated rhenium nanoclusters: a degradable metal photothermal nanoagent for cancer therapy**

Zhaohua Miao<sup>#ab</sup>, Sheng Chen<sup>#c</sup>, Cheng-Yan Xu<sup>b</sup>, Yan Ma<sup>\*a</sup>, Haisheng Qian<sup>a</sup>, Yunjun Xu<sup>d</sup>, Huajian Chen<sup>a</sup>, Xianwen Wang<sup>a</sup>, Gang He<sup>a</sup>, Yang Lu<sup>\*c</sup>, Qingliang Zhao<sup>e</sup> and Zhengbao Zha<sup>\*a</sup>

<sup>a</sup> School of Food and Biological Engineering, Hefei University of Technology, Hefei, Anhui 230009, P. R. China. Email: yanma@hfut.edu.cn, zbzha@hfut.edu.cn

<sup>b</sup> State Key Laboratory of Advanced Welding and Joining, Harbin Institute of Technology, Harbin, 150001, P. R. China.

<sup>c</sup> School of Chemistry and Chemical Engineering, Hefei University of Technology, Hefei, Anhui, 230009, P.R. China. Email: yanglu@hfut.edu.cn

<sup>d</sup> The First Affiliated Hospital of University of Science and Technology of China, Anhui Province Hospital, Hefei 230001, P.R. China.

<sup>e</sup> State Key Laboratory of Molecular Vaccinology and Molecular Diagnostics & Center for Molecular Imaging and Translational Medicine, School of Public Health, Xiamen University, Xiamen 361102, China.

<sup>#</sup> These authors contribute equally to this work.

E-mail: yanma@hfut.edu.cn, yanglu@hfut.edu.cn, zbzha@hfut.edu.cn

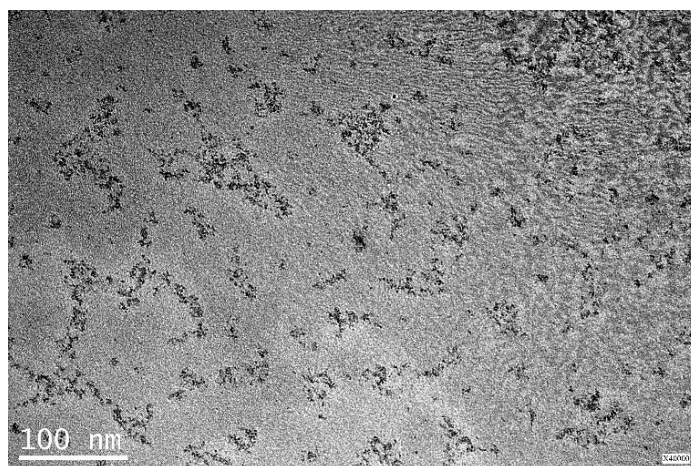

**Figure S1.** TEM image of PEGylated Re nanoclusters

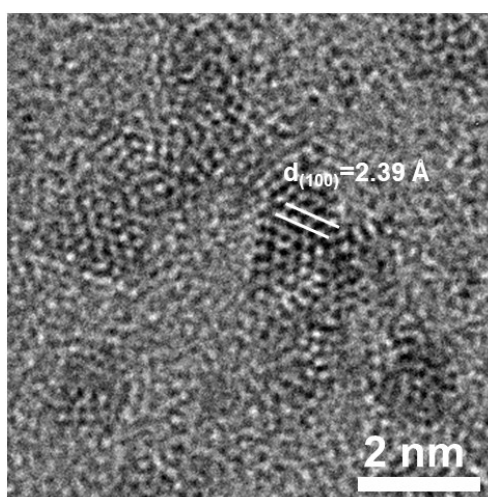

**Figure S2.** HRTEM image of hexagonal Re nanoclusters

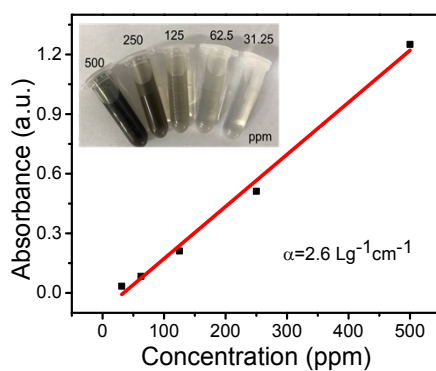

**Figure S3.** The fitting curve of the absorbance at 808 nm vs different concentrations of Re dispersions, inset the digital image of Re NCs dispersions at different concentrations.

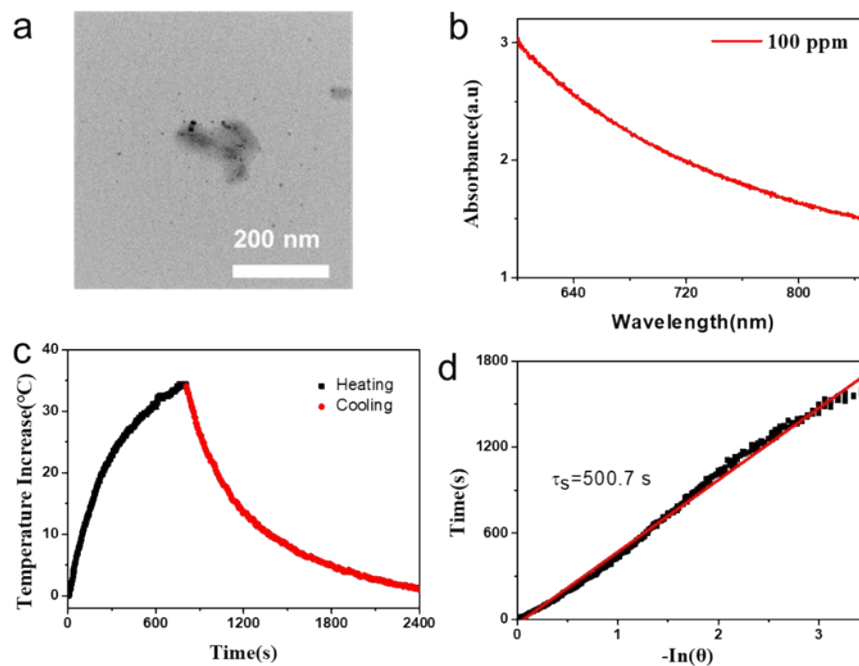

**Figure S4.** (a) TEM image of black phosphorus, (b) UV-vis-NIR absorption curve of black phosphorus (100 ppm), (c) the heating/cooling curves of black phosphorus under laser irradiation (2 W, 808 nm); (d) The fitting linear curve of time data vs  $-\ln\theta$  from the cooling period of black phosphorus.

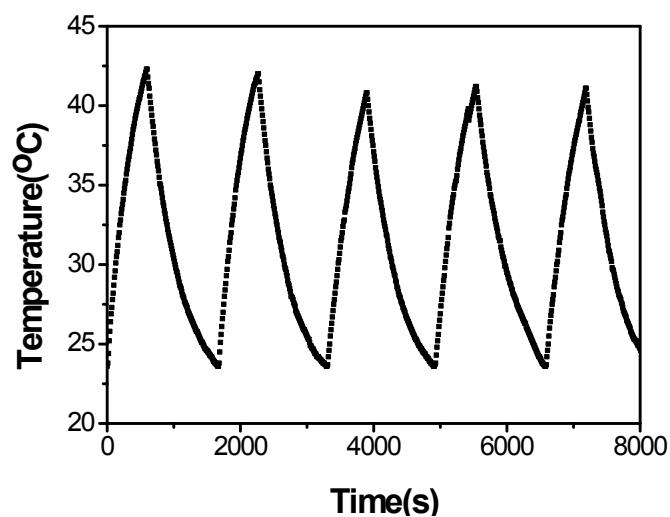

**Figure S5.** Five irradiation cycles of Re nanoclusters with a concentration of 125 ppm.

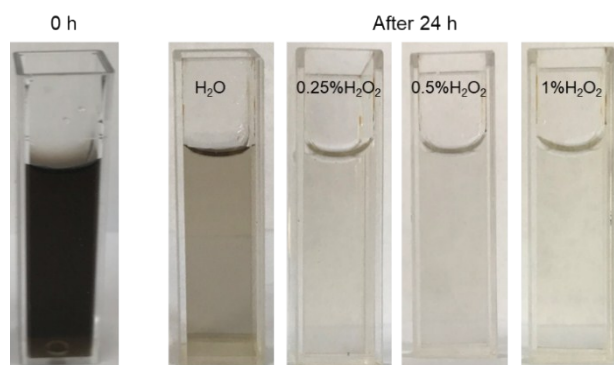

**Figure S6.** Digital photographs of Re nanoclusters dispersions with a concentration of 500 ppm after incubation in H<sub>2</sub>O, 0.25%, 0.5% and 1% H<sub>2</sub>O<sub>2</sub> solution for 24 h.

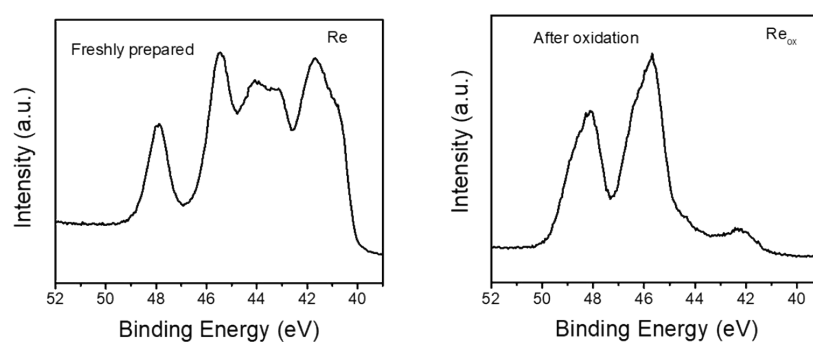

**Figure S7.** XPS spectra of freshly prepared and after the oxidation of Re nanoclusters. The oxidation process is conducted by incubation of Re nanoclusters dispersions (2 mg/mL) in H<sub>2</sub>O<sub>2</sub> (0.5%) for 24 h.

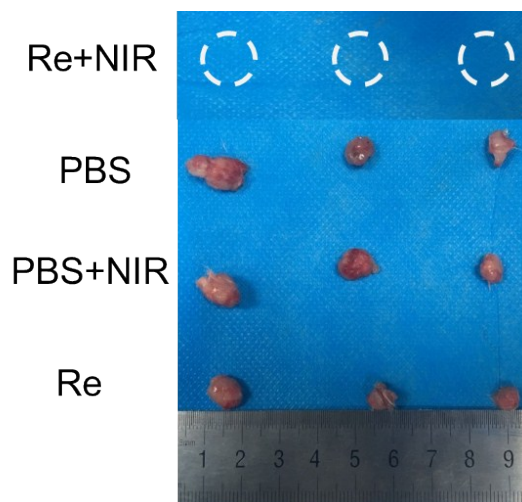

**Figure S8.** Digital photographs of tumors extracted from different groups after the PTT treatment.

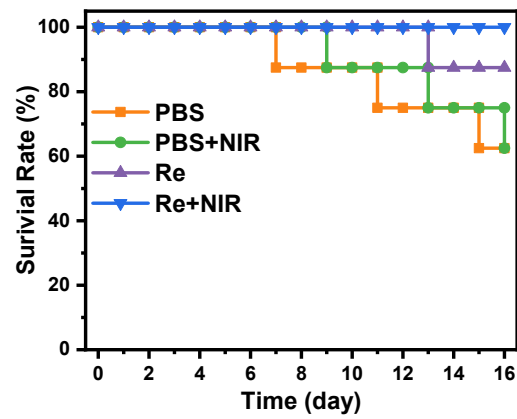

**Figure S9.** The survival rate of mice after various treatments.

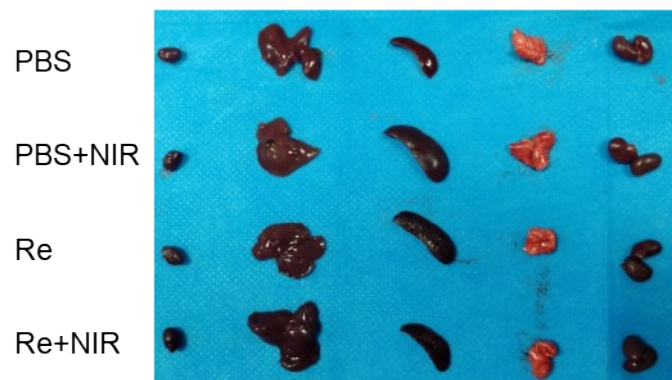

**Figure S10.** Digital photographs of major organs (heart, liver, spleen, lung and kidney) of representative mice from different groups as indicated.

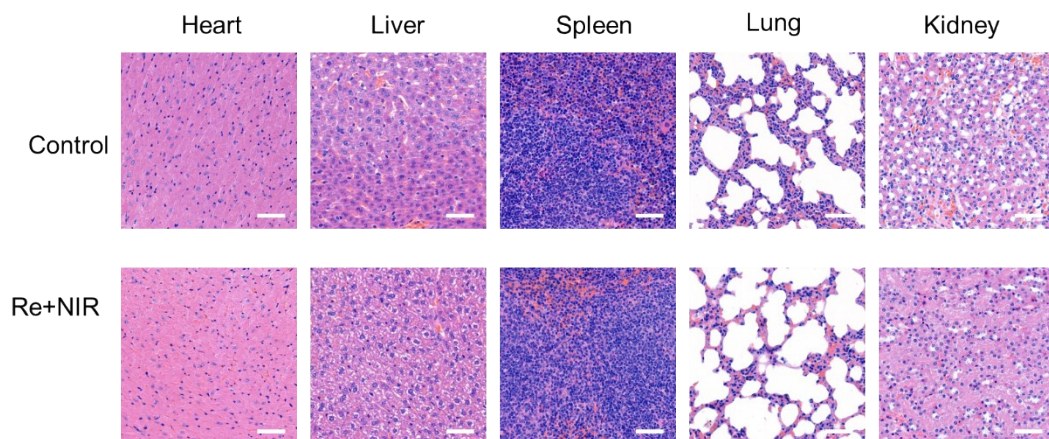

**Figure S11.** Representative H&E images of major organs (heart, liver, spleen, lung and kidney) of representative mice from healthy group and “Re+NIR” group. Scale bar is 50  $\mu\text{m}$

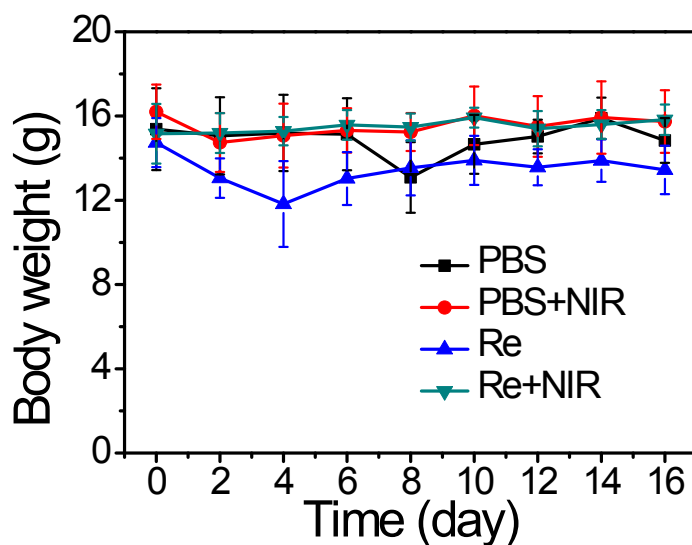

**Figure S12.** Body weight of mice from different groups within 16 days

## Additional Experiments

### Synthesis of Gold Nanoparticles

The fabrication of Au nanoparticles with an average diameter of 3 nm was according to a previous report.<sup>1</sup> 1.0 mL of H<sub>AuCl</sub><sub>4</sub> aqueous solution (1% w/v) was added into 100 mL of DI water under vigorous stirring for 1 min, followed by the addition of 1 mL of sodium citrate solution (1% w/v). After stirred for another one minute, 1.0 mL of NaBH<sub>4</sub> (0.075% w/v) in sodium citrate (1% w/v) solution was added and continuously stirred for 5 min. Then, 2 mL of PEG-SH solution (5 mg/mL) was added and stirred for 6 h. At last, PEG-SH modified Au nanoparticles were obtained by ultrafiltration centrifugation (4500 rpm, 10 min) and washed with D.I water for four times.

### Photothermal Performance of Rhenium Nanoclusters

2 mL of Re nanoclusters aqueous dispersion with different concentrations was put in a quartz cuvette, and then irradiated by a 808 nm laser (2 W) for 10 min. D.I. water was used as control. A thermocouple probe with a digital thermometer was used to record the temperature of aqueous dispersions every 10 s.

To calculate the photothermal conversion efficiency ( $\eta$ ), a previously reported method was adapted<sup>2</sup>. In brief, 2 mL of Re nanoclusters aqueous dispersion (250 ppm) was continuously irradiated by a NIR laser (808 nm, 2 W) until the temperature reached a plateau, and then the laser was shut off. The heating/cooling period was recorded every 10 s. Base on the temperature change vs time, the value of  $\eta$  can be calculated as follows by equation S1:

$$\eta = \frac{hS(T_{max} - T_{surr}) - Q_s}{I(1 - 10^{-A_{808}})}$$

(1)

where  $h$  is the heat transfer coefficient of the whole system,  $S$  is the surface area of the quartz tube,  $T_{max}$  is the highest temperature in plateau period,  $T_{surr}$  is the surrounding temperature,  $Q_s$  is the heat related with the light absorbance of water,  $I$  is the power (2 W) of NIR laser, and  $A_{808}$  represents the absorbance of Re nanoclusters aqueous dispersion.

The value of  $hS$  can be determined by the following equation S2:

$$\tau_s = \frac{m_D C_D}{hS}$$

(2)

where  $\tau_s$  is time constant of the whole system,  $m_D$  and  $C_D$  are the mass of water (2 g) and heat capacity of water (4.2 J/(g $\square$ °C)), respectively. In order to acquire the value of  $hS$ , the parameter of  $\theta$  is defined by the following equation S3:

$$\theta = \frac{T - T_{surr}}{T_{max} - T_{surr}}$$

(3)

where  $T$  is the real-time temperature of Re nanoclusters aqueous dispersion during the irradiation period. Hence,  $hS$  can be determined by linearly fitting time data vs  $-\ln\theta$  during the cooling period.

## References

- 1 H. Ke, J. Wang, Z. Dai, Y. Jin, E. Qu, Z. Xing, C. Guo, X. Yue and J. Liu, *Angewandte Chemie International Edition*, 2011, **50**, 3017.
- 2 D. K. Roper, W. Ahn and M. Hoepfner, *The Journal of Physical Chemistry C*, 2007, **111**, 3636.
